# Supplementary material
Source: MDPI journal article supplement (https://www.mdpi.com/2071-1050/13/15/8673)
Supplement: s1 [file s1]

Archive with 3 entries (3 files):
- Figure S1_survey.pdf
- Figure S2_Ethic_committee_report.pdf
- Table S1_data.xlsx
