# Supplementary material
Source: MDPI journal article supplement (https://www.mdpi.com/2071-1050/13/15/8673)
Supplement: s1 [file s1 › Figure S2_Ethic_committee_report.pdf]

# Traductora-Intérprete Jurada

NOMBRADA POR EL MINISTERIO DE ASUNTOS EXTERIORES, UNIÓN EUROPEA Y COOPERACIÓN ESPAÑOL  
Nº TIJ: 1756

MARÍA TERESA DE LAS MATAS VEGA

## Sworn Translator-Interpreter

APPOINTED BY THE SPANISH MINISTRY OF FOREIGN AFFAIRS, THE EUROPEAN UNION AND COOPERATION  
STI No.: 1756

MARÍA TERESA DE LAS MATAS VEGA  
Traductora-Intérprete Jurada de INGLÉS  
N.º 1756

### TRANSLATION FROM SPANISH

[University emblem and logo, in Basque]

Universidad del País Vasco /  
Euskal Herriko Unibertsitatea  
[University of the Basque Country]

CAMPUS OF  
INTERNATIONAL  
EXCELLENCE

VICE-RECTORATE FOR RESEARCH

**REPORT BY THE COMITÉ DE ÉTICA PARA LAS INVESTIGACIONES CON SERES HUMANOS, SUS MUESTRAS Y SUS DATOS** [HUMAN RESEARCH ETHICS COMMITTEE (INDIVIDUALS, SAMPLES AND DATA)] (CEISH -UPV/EHU)

I, **Maria Jesús Marcos Muñoz**, acting as Secretary of the CEISH of the Universidad del País Vasco/Euskal Herriko Unibertsitatea (UPV/EHU) [University of the Basque Country],

#### HEREBY CERTIFY:

That this Human Research Ethics Committee, CEISH-UPV/EHU, BOPV [Official Gazette of the Basque Country] issue 32 of 17/2/2014) **has assessed** the proposal submitted by the researcher:

**Ms Zaloa Aginako Arri**, M10\_2020\_030, for the conducting of the research project: "Sustainable development in the Mechanical Engineering, Electrical Engineering and Industrial Electronics and Automation Engineering degrees at the Faculty of Engineering in Bilbao (UPV/EHU). How students perceive placement in degree courses, what knowledge [...]"

#### Considering that:

1. The research is justified because its goals will help increase knowledge and provide a benefit to society that more than offsets the inconveniences and risks envisaged
2. The capabilities of the research team and the resources available are adequate
3. The research is planned in line with the methodological and ethical requirements for its implementation, as per the criteria for good practices in scientific research
4. The research complies with the regulations in force, including the obtaining of the permits, agreements and covenants needed to perform it,

at the meeting held on 23 April 2020 (minutes 124/2020), **A FAVOURABLE REPORT** was issued in regard to the conducting of this research project by this research team:

Zalao Aginako Arri  
Teresa Guraya Díaz  
Begoña Peña Lang  
Miren Terese Bedialauneta Landiribar

|        |                     |
|--------|---------------------|
| MARÍA  | Signed digitally by |
| JESÚS  | MARÍA JESÚS         |
| MARCOS | MARCOS MUÑOZ        |
| MUÑOZ  | Date: 2020.05.20    |
|        | 13:59:19 +02'00'    |

Technical Secretary of the CEISH-UPV/EHU

Signed in Leioa on 20 May 2020

susi.marcos@ehu.es  
www.ehu.es/CEID

BIZKAIA CAMPUS  
Sarriena Auzoa, z/g  
48940 LEIOA

I, MARÍA TERESA DE LAS MATAS VEGA,  
Sworn Translator and Interpreter of ENGLISH  
appointed by the Ministry of Foreign Affairs, the  
European Union and Cooperation, certify that  
this is a true and complete translation into  
English of a document originally written in  
Spanish.

Done in Bilbao, this eighth day of April, two  
thousand and twenty-one.

D.<sup>a</sup> MARÍA TERESA DE LAS MATAS VEGA,  
Traductora-Intérprete Jurada de INGLÉS en virtud  
de título otorgado por el Ministerio de Asuntos  
Exteriores, Unión Europea y Cooperación,  
certifica que la que antecede es traducción fiel y  
completa al inglés de un documento redactado  
en español.

En Bilbao, a 8 de abril de 2021.

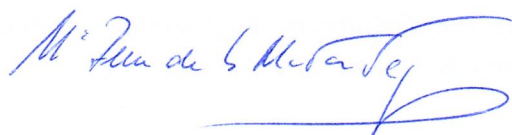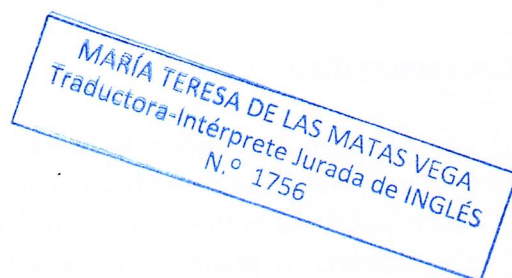

## GIZAKIEKIN ETA HAUEN LAGIN ETA DATUEKIN EGINDAKO IKERKETEI BURUZKO ETIKA BATZORDEAREN (GIEB-UPV/EHU) TXOSTENA

M<sup>a</sup> Jesús Marcos Muñoz andreak, Universidad del País Vasco/Euskal Herriko Unibertsitateko (UPV/EHU) GIEBeko idazkari gisa,

## INFORME DEL COMITÉ DE ÉTICA PARA LAS INVESTIGACIONES CON SERES HUMANOS, SUS MUESTRAS Y SUS DATOS (CEISH-UPV/EHU)

M<sup>a</sup> Jesús Marcos Muñoz como Secretaria del CEISH de la Universidad del País Vasco/Euskal Herriko Unibertsitatea (UPV/EHU)

### ZIURTATZEN DU

Ezen gizakiekin egindako ikerkuntzaren etika batzorde honek, GIEB-UPV/EHU, (2014/2/17ko 32. EHAA)

**Balioetsi duela** ondoko ikertzailearen proposamen hau:

**Zaloe Aginako Arri andreak**, M10\_2020\_030, honako ikerketa proiektu hau egiteko:

"Desarrollo sostenible en los grados de ingeniería mecánica, ingeniería eléctrica e ingeniería electrónica industrial y automática de la Escuela de Ingeniería de Bilbao (UPV/EHU). Cómo perciben los estudiantes la inserción en los grados, qué conocimiento t"

### Eta aintzat hartuta ezen

1. Ikerketa justifikatuta dago, bere helburuei esker jakintza areagotu eta gizarteari onura ekarriko baitio, ikerlanak lekartzakeen eragozpen eta arriskuak arrazoizko izanik.
2. Ikertzaile taldearen gaitasuna eta erabilgarri dituzten baliabideak aproposak dira proiektua gauzatzeko.
3. Ikerketaren planteamendua bat dator era honetako ikerkuntza egin ahal izateko baldintza metodologiko eta etikoein, ikerkuntza zientifikoaren praktika egokien irizpideei jarraiki.
4. Indarreko arauak betetzen ditu, ikerketa egin ahal izateko baimenak, akordioak edo hitzarmenak barne.

**Aldeko Txostena eman du** 2020ko apirilaren 23an egin duen bileran (124/2020akta) aipatutako ikerketa proiektua ondoko ikertzaileek osatutako taldeak egin dezan:

Zaloe Aginako Arri  
Teresa Guraya Díaz  
Begoña Peña Lang  
Miren Terese Bedialauneta Landiribar

MARIA  
JESUS  
MARCOS  
MUÑOZ

Firmado  
digitalmente por  
MARIA JESUS  
MARCOS MUÑOZ  
Fecha: 2020.05.20  
13:59:19 +02'00'

GIEB-UPV/EHUko idazkari teknikoa  
Secretaria Técnica del CEISH-UPV/EHU

### CERTIFICA

Que este Comité de Ética para la Investigación con Seres Humanos, CEISH-UPV/EHU, BOPV 32, 17/2/2014, **Ha evaluado** la propuesta de la investigadora:

**Dña. Zaloe Aginako Arri**, M10\_2020\_030, para la realización del proyecto de investigación: "*Desarrollo sostenible en los grados de ingeniería mecánica, ingeniería eléctrica e ingeniería electrónica industrial y automática de la Escuela de Ingeniería de Bilbao (UPV/EHU). Cómo perciben los estudiantes la inserción en los grados, qué conocimiento t*"

### Y considerando que,

1. La investigación está justificada porque sus objetivos permitirán generar un aumento del conocimiento y un beneficio para la sociedad que hace asumibles las molestias y riesgos previsibles.
2. La capacidad del equipo investigador y los recursos disponibles son los adecuados para realizarla.
3. Se plantea según los requisitos metodológicos y éticos necesarios para su ejecución, según los criterios de buenas prácticas de la investigación científica.
4. Se cumple la normativa vigente, incluidas las autorizaciones, acuerdos o convenios necesarios para llevarla a cabo.

**Ha emitido** en la reunión celebrada el 23 de abril de 2020 (acta 124/2020), **INFORME FAVORABLE** a que dicho proyecto de investigación sea realizado, por el equipo investigador:

Zaloe Aginako Arri  
Teresa Guraya Díaz  
Begoña Peña Lang  
Miren Terese Bedialauneta Landiribar

Eta halaxe sinatu du Leioan, 2020ko maiatzaren 20an

Lo que firmo en Leioa, a 20 de mayo de 2020
