# Supplementary material
Source: MDPI journal article supplement (https://www.mdpi.com/2071-1050/13/15/8673)
Supplement: s1 [file s1 › Table S1_data.xlsx]

## Sheet: data
Code	Part 1		Part 2		Part 3																														Part 4								Part 5
					Insertion level scale															Importance Scale															Activities in UPV/EHU							Act out upv	Q9						Q10
	course	degree	Q1	Q2	5.1	5.2	5.3	5.4	5.5	5.6	5.7	5.8	5.9	5.10	5.11	5.12	5.13	5.14	5.15	6.1	6.2	6.3	6.4	6.5	6.6	6.7	6.8	6.9	6.10	6.11	6.12	6.13	6.14	6.15	cooperation	FYP	SL	footprint	sust_courses	Gender	Other		E	P	FG	S	C	U
1	1	2	B	E	1	1	1	1	1	1	1	1	1	1	1	1	1	1	1	5	5	5	5	5	5	5	5	4	3	2	1	2	3	4	No	No	No	No	No	No	No	No	3	4	4	3	3	3	3
2	3	4	B	E	1	2	2	1	2	2	1	1	1	1	1	1	1	1	1	5	5	4	4	4	5	4	4	4	4	4	4	4	5	4	No	No	No	No	No	No	No	No	4	4	0	0	4	4	4
3	2	3	B	B	1	2	2	1	2	1	2	1	1	1	1	1	1	1	1	3	5	5	5	4	4	5	3	4	5	4	5	5	4	5	No	No	No	No	No	No	No	Yes	4	4	2	4	4	4	0
4	3	4	A	B	2	2	3	3	3	2	2	1	2	3	4	2	2	1	2	4	4	5	5	5	3	4	5	4	3	5	5	4	4	4	No	No	No	No	No	No	No	No	4	4	3	2	2	2	3
5	2	4	A	E	1	1	2	1	1	1	1	2	1	2	1	1	2	1	1	4	5	5	5	5	5	5	5	5	5	5	5	5	5	5	No	No	No	No	No	No	No	No	3	4	1	4	4	4	4
6	3	4	B	B	1	2	2	1	3	2	2	1	2	2	1	1	2	2	2	3	3	2	3	4	3	3	4	4	4	2	4	4	3	4	No	No	No	No	No	No	No	No	3	3	2	3	4	4	0
7	2	4	A	B	1	1	2	1	2	2	1	2	1	2	1	2	2	2	2	5	5	5	5	5	5	5	5	4	5	5	5	5	5	4	No	No	No	No	No	No	No	Yes	4	4	4	4	4	4	3
8	2	3	A	E	1	2	1	1	1	1	1	1	1	1	1	1	1	1	1	4	4	3	5	4	4	4	3	2	3	3	2	4	2	3	No	No	No	No	No	No	No	No	3	3	3	4	4	4	3
9	3	3	B	A	1	2	3	1	2	1	1	1	3	1	1	2	2	1	1	3	4	3	3	3	3	3	3	3	3	4	2	5	2	3	No	No	No	No	No	No	No	No	2	3	4	4	4	4	3
10	2	4	A	B	4	3	4	2	3	2	3	2	4	5	4	2	2	3	3	4	4	5	4	4	5	2	4	3	4	3	3	5	4	4	No	No	No	No	No	No	No	No	2	3	3	2	3	4	3
11	3	2	B	A	2	3	3	3	3	3	1	1	1	3	2	2	1	2	2	4	3	4	5	5	4	5	4	4	4	4	4	3	3	4	No	No	No	No	No	No	No	No	3	3	0	2	2	0	3
12	1	4	A	E	2	1	1	1	1	1	1	1	1	1	1	1	1	1	1	5	5	5	5	5	5	5	5	5	5	4	3	3	4	5	No	No	No	No	No	No	No	No	4	3	3	4	4	4	4
13	3	4	A	E	1	2	3	2	2	2	2	1	2	2	3	1	2	1	2	5	4	4	5	3	4	3	2	3	3	3	3	3	3	3	No	No	No	No	No	No	No	No	4	4	0	3	4	4	3
14	3	4	A	A	1	2	2	2	2	1	2	1	1	2	1	1	1	1	1	4	5	4	4	5	4	5	3	3	3	4	3	4	3	3	No	No	No	No	No	No	No	No	3	4	1	3	2	3	4
15	4	4	B	C	2	2	3	2	3	3	3	2	2	3	3	2	2	2	2	3	4	4	4	4	5	4	4	3	4	4	4	3	4	3	No	No	No	No	No	No	No	Yes	3	3	2	3	2	3	3
16	3	4	A	C	1	2	2	1	2	1	2	1	1	2	2	1	2	1	1	5	5	4	5	5	5	5	5	4	5	5	5	4	5	5	Yes	No	Yes	Yes	No	Yes	No	Yes	4	4	2	3	3	4	4
17	3	4	B	E	1	2	2	1	1	1	4	2	1	4	1	2	1	1	2	5	5	4	5	4	5	5	5	4	4	5	4	4	3	4	No	No	No	No	No	Yes	No	No	4	4	4	4	4	4	4
18	1	4	A	C	5	5	5	5	5	5	5	5	4	5	4	5	5	4	5	5	3	5	5	4	5	5	5	4	5	4	5	5	5	5	No	No	No	No	No	No	No	No	3	3	4	4	3	4	4
19	4	3	B	B	1	1	2	1	2	2	2	1	2	1	2	2	2	1	1	4	5	5	5	5	5	5	4	4	5	4	5	4	4	5	No	No	No	No	No	No	No	No	4	4	3	4	4	4	3
20	4	4	A	B	2	2	4	2	3	5	3	2	3	2	2	2	1	2	2	4	5	5	4	5	5	5	5	5	4	5	4	5	3	4	No	No	Yes	No	Yes	Yes	No	Yes	4	3	2	3	4	4	4
21	4	4	B	D	2	3	3	2	3	1	2	2	3	3	2	1	1	1	1	4	5	4	4	4	4	5	5	3	5	5	4	4	3	4	No	No	No	No	No	No	No	No	3	4	3	3	4	4	3
22	4	3	B	D	2	2	3	2	3	2	4	1	2	2	2	2	1	2	2	4	5	4	4	5	5	5	3	3	3	4	4	4	4	4	No	No	No	No	No	No	No	No	4	4	3	3	4	4	4
23	4	3	B	A	2	2	2	2	2	2	2	2	1	3	2	1	2	2	2	3	3	3	3	3	3	2	2	2	3	3	3	3	3	3	No	No	No	No	No	No	No	No	4	2	2	3	3	3	3
24	3	4	B	A	2	3	3	2	3	2	2	1	1	2	3	1	2	1	1	5	5	4	5	5	4	5	4	4	4	5	4	3	4	4	No	No	No	No	No	No	No	No	3	3	2	3	4	4	3
25	3	4	A	E	2	1	2	2	1	1	1	1	1	2	2	1	1	1	1	4	5	5	5	4	5	4	5	5	5	5	5	4	5	5	No	No	No	No	No	No	No	No	4	3	3	4	4	4	0
26	1	2	A	D	3	3	3	3	3	3	3	3	3	3	3	3	3	3	3	4	4	4	4	4	4	3	4	2	3	4	4	4	3	4	Yes	Yes	Yes	Yes	Yes	Yes	No	No	2	3	2	2	2	3	3
27	3	2	A	C	2	2	3	3	3	2	2	1	1	3	4	3	2	2	2	4	4	5	5	4	5	5	4	3	4	4	4	3	4	4	No	No	No	No	No	No	No	No	3	3	3	3	3	3	3
28	2	3	A	B	2	2	2	2	2	2	2	2	2	2	2	2	2	2	2	4	4	5	5	5	4	4	5	4	5	4	5	4	4	4	No	No	No	No	No	No	No	No	3	3	4	4	4	4	3
29	1	3	B	D	3	4	3	3	4	4	5	3	3	3	3	3	4	3	3	5	5	5	5	5	5	5	5	5	5	5	5	5	5	5	No	No	No	No	No	No	No	No	4	4	4	4	4	4	4
30	1	2	B	B	1	1	1	1	1	1	1	1	1	1	1	1	1	1	1	3	2	3	5	5	4	5	4	2	1	3	3	4	4	2	No	No	No	No	No	No	No	No	3	3	0	4	3	4	0
31	1	4	A	A	1	2	1	3	1	2	3	2	2	4	4	2	1	2	1	5	4	4	5	5	5	5	5	4	5	5	5	4	4	5	No	No	Yes	No	No	Yes	No	No	4	3	3	4	4	4	3
32	4	4	B	C	2	2	2	2	3	2	2	1	2	2	2	1	2	2	2	5	4	4	5	5	5	5	4	4	4	4	4	5	5	4	No	No	No	No	No	No	No	No	4	4	4	4	4	4	4
33	4	3	B	C	2	2	2	2	2	2	2	2	1	2	2	1	2	2	1	5	5	4	5	5	5	5	5	4	5	5	5	4	5	5	No	No	No	No	No	No	No	No	4	3	4	4	4	4	3
34	4	3	B	C	2	2	3	2	3	3	2	1	1	3	2	2	2	2	1	5	5	5	5	4	5	5	5	4	4	5	5	3	5	5	No	Yes	No	No	No	No	No	Yes	4	4	2	2	2	3	4
35	4	3	A	C	2	2	2	2	2	1	2	1	1	1	2	1	2	2	1	4	4	5	5	4	5	5	5	4	5	5	4	4	4	4	No	No	No	No	No	No		Yes	4	4	3	4	4	4	0
36	2	4	B	D	1	2	1	1	1	2	1	1	2	2	1	1	1	1	1	4	4	5	5	5	5	5	5	4	5	5	5	4	3	5	No	No	No	No	No	No	No	Yes	3	4	4	4	4	4	4
37	1	4	B	E	2	2	1	2	1	1	2	1	1	1	1	1	1	1	1	5	5	5	5	5	5	5	5	5	5	5	5	5	5	5	No	No	No	No	No	No	No	No	4	4	3	2	1	2	3
38	1	4	A	C	1	2	2	2	1	1	1	1	1	1	1	1	1	1	1	4	5	5	5	5	5	5	4	5	5	4	3	4	4	3	Yes	No	No	No	No	No	No	No	4	3	2	1	2	4	3
39	3	3	B	E	2	2	2	1	2	1	3	1	1	4	5	1	4	2	2	4	4	5	5	5	5	5	5	3	4	4	3	5	5	3	No	No	No	No	No	No	No	No	3	4	3	3	2	4	4
40	3	3	B	D	2	2	2	2	2	2	2	2	2	2	2	2	1	1	1	4	4	4	4	4	4	4	4	4	4	4	4	4	4	4	No	No	No	Yes	Yes	Yes	No	No	3	3	3	3	3	3	4
41	3	3	A	C	1	1	1	1	1	1	5	1	1	1	2	1	3	1	1	5	5	5	5	5	5	5	5	5	5	5	5	5	5	5	No	Yes	Yes		Yes	Yes		Yes	4	4	2	3	2	4	4
42	4	3	B	D	2	2	2	2	2	2	2	1	2	1	2	1	1	2	1	5	5	5	5	5	5	5	4	4	5	4	4	5	5	4	No	No	No	No	No	Yes	Yes	No	4	4	2	2	1	4	4
43	3	3	A	E	3	3	3	2	3	1	2	1	1	2	2	3	2	2	2	1	4	5	4	5	1	1	1	3	1	3	1	4	1	3	No	No	No	Yes	Yes	No	No	Yes	3	1	0	0	2	3	1
44	4	3	B	B	2	2	2	2	2	2	2	1	1	1	1	1	1	1	1	5	5	5	5	5	5	5	4	4	4	5	4	4	3	3	Yes	No	No	No	No	No	No	Yes	3	3	2	3	4	4	3
45	4	3	A	E	2	2	2	2	3	1	2	1	1	2	2	1	3	2	1	4	5	3	3	4	5	5	4	4	5	4	3	4	3	3	Yes	Yes	No	No	No	No	No	No	4	4	4	3	4	4	3
46	3	3	B	D	2	2	2	2	2	2	2	2	2	2	2	2	1	1	1	4	4	4	4	4	4	4	4	4	4	4	4	4	4	4	No	No	No	Yes	Yes	Yes	No	No	3	3	3	3	3	3	4
47	3	3	B	D	2	2	2	2	2	2	2	2	2	2	2	2	1	1	1	4	4	4	4	4	4	4	4	4	4	4	4	4	4	4	No	No	No	Yes	Yes	Yes	No	No	3	3	3	3	3	3	4
48	4	4	A	E	5	5	5	5	5	5	5	2	5	5	5	5	4	5	2	5	5	5	5	5	5	5	4	4	4	5	5	5	4	3	No	No	No	No	No	No	No	No	3	4	4	4	4	4	3
49	2	4	B	E	1	2	2	1	1	1	1	1	1	1	1	1	1	1	1	5	5	5	5	5	5	5	5	4	5	5	3	5	3	4	No	No	No	No	No	No	No	No	4	4	4	4	4	4	2
50	2	3	A	C	1	2	2	1	3	3	3	1	3	1	5	1	1	1	1	5	5	5	5	5	5	5	5	5	3	5	5	5	5	5	Yes	No	Yes	No	No	No	Yes		4	4	1	3	4	4	4
51	3	4	B	A	3	2	2	2	3	2	3	2	2	2	3	1	2	2	1	4	5	4	5	4	4	5	4	4	4	5	4	4	4	4	Yes	No	Yes	Yes	Yes	No	No	Yes	3	2	2	2	2	3	3
52	2	3	A	E	1	2	2	1	4	2	1	1	1	2	1	1	2	1	1	3	5	4	3	5	3	3	1	3	3	4	1	5	1	3	No	No	No	No	No	No	No	No	3	2	3	4	4	4	0
53	2	3	B	C	2	2	2	3	2	2	2	2	2	3	2	2	3	2	2	5	5	5	5	5	5	5	5	5	5	5	5	5	5	5	Yes	No	No	No	No	No	No	Yes	4	4	4	4	4	4	4
54	4	3	B	D	4	2	3	4	2	4	4	3	4	5	4	4	4	3	2	4	4	5	5	4	5	5	5	5	5	4	5	4	5	4	No	No	Yes	No	No	No	No	No	4	4	3	2	2	3	4
55	3	4	B	E	1	2	3	2	3	2	1	1	2	2	2	2	1	1	1	3	5	5	4	5	4	3	3	4	3	5	3	4	3	5	No	No	No	No	No	No	No	Yes	4	3	3	3	4	2	4
56	3	3	A	B	1	2	1	1	1	1	1	1	1	1	1	1	1	1	1	4	5	5	5	5	5	5	5	5	5	5	5	5	5	5	No	No	No	No	No	No	No	No	4	4	1	2	2	2	4
57	2	3	A	D	2	2	3	2	2	1	1	1	1	2	3	2	1	1	1	5	4	4	4	4	5	4	5	4	5	4	4	5	5	5	Yes	No	No	No	No	Yes	Yes	No	4	3	2	2	1	1	4
58	4	3	A	D	3	4	4	4	4	4	4	2	2	2	2	2	2	2	2	5	5	5	5	5	5	5	5	5	5	5	5	5	5	5	No	No	No	No	No	No	No	No	4	4	3	1	1	2	4
59	3	3	B	E	2	2	2	2	2	2	2	2	2	2	2	2	2	2	2	5	5	5	5	5	5	5	5	5	5	5	4	5	4	4	No	No	No	No	No	No	No	Yes	4	4	2	1	2	3	3
60	2	3	B	E	1	2	2	1	1	1	1	1	1	2	2	1	2	1	1	4	4	4	4	4	5	5	3	3	3	4	3	5	2	3	No	No	No	No	No	No		Yes	4	4	1	2	2	3	3
61	1	3	A	C	1	2	2	2	2	2	2	2	2	2	2	2	2	2	1	4	4	4	5	5	5	5	5	4	5	4	5	4	4	4	No	No	No	No	No	Yes	No	Yes	3	4	4	4	4	4	2
62	1	4	A	D	2	2	4	2	1	2	2	1	1	2	2	1	2	2	1	5	5	5	5	4	5	5	5	5	4	5	5	4	5	4	Yes	No	No	No	No	No	No	Yes	4	4	3	3	4	4	3
63	4	3	C	B	5	5	1	2	3	1	3	3	4	2	4	2	2	2	3	3	4	1	5	1	5	1	5	1	5	1	5	1	5	1	No	Yes	No	Yes	No	Yes	No	No	3	4	2	0	1	3	1
64	4	4	B	D	2	2	3	2	3	3	4	2	2	2	2	2	3	2	2	5	5	5	5	5	5	5	5	5	5	5	5	5	5	5	No	No	No	No	No	No	No	No	4	4	4	4	4	4	3
65	4	3	B	C	2	2	3	2	2	2	2	1	2	2	2	2	1	2	1	5	5	5	5	5	5	5	5	5	5	5	5	5	5	5	Yes	No	No	No	No	No	No	Yes	4	4	2	3	3	4	4
66	1	2	B	E	1	2	2	2	1	1	1	1	1	1	2	1	1	1	1	4	4	5	5	5	4	5	5	4	5	4	5	5	4	5	No	No	No	No	No	No	No	No	4	3	3	2	2	2	4
67	3	2	D	E	1	1	1	1	1	1	2	1	1	1	1	1	2	1	1	4	5	5	5	5	5	5	5	2	2	5	5	5	5	5	No	No	No	No	No	Yes	Yes	No	3	3	1	0	0	3	1
68	2	3	A	E	1	2	3	1	2	1	1	1	1	1	1	1	1	1	1	4	5	5	5	5	3	3	2	4	4	3	3	4	3	3	No	No	No	No	No	No	No	No	2	3	2	1	1	2	3
69	2	3	B	D	2	1	2	2	1	1	1	1	1	2	1	1	1	1	1	5	5	5	5	5	5	5	5	5	5	5	5	5	5	5	No	No	No	No	No	No	No	Yes	4	4	4	4	4	4	4
70	1	4	A	C	1	1	1	1	1	1	1	1	1	1	1	1	1	1	1	5	5	5	5	5	5	5	5	5	5	5	5	5	5	5	Yes	No	No	No	No	No	No	No	4	4	4	4	4	4	4
71	4	2	B	A	2	2	1	2	1	2	1	1	1	1	2	1	1	2	1	5	4	5	5	5	5	4	5	4	5	5	5	3	5	5	No	No	No	Yes	Yes	No	No	Yes	4	4	4	4	4	4	4
72	1	3	A	C	1	1	2	1	1	1	1	1	1	1	1	1	1	1	1	4	3	3	4	5	3	3	3	3	2	3	3	4	3	3	No	No	No	No	No	No	No	Yes	4	3	2	4	3	3	4
73	1	4	B	D	1	1	1	1	1	1	1	1	1	1	1	1	1	1	1	5	5	5	5	5	5	4	5	3	4	5	5	4	5	5	No	No	No	No	No	No	No	No	4	4	2	1	1	1	4
74	4	3	B	B	2	2	4	2	4	4	2	1	1	3	1	1	3	3	4	3	4	5	4	5	4	4	5	5	4	5	5	5	4	4	No	No	No	No	No	Yes	No	No	4	4	1	1	3	1	2
75	1	2	B	A	1	1	1	1	1	1	1	1	1	1	1	1	1	1	1	5	5	5	5	5	4	5	4	4	5	5	4	5	4	5	No	No	No	No	No	No	No	Yes	2	4	4	3	4	4	1
76	3	3	B	C	2	2	2	1	3	3	2	2	2	3	2	2	2	1	2	3	4	4	5	5	4	5	3	4	4	4	4	4	3	4	No	No	No	No	No	Yes	No	Yes	3	4	4	2	2	3	3
77	1	2	A	B	2	2	3	1	1	2	1	2	2	2	4	2	1	2	2	4	3	4	3	4	4	4	3	4	5	4	5	4	5	5	No	No	No	No	No	Yes	No	No	4	3	3	4	3	2	4
78	2	4	B	A	2	2	1	2	3	3	1	2	1	3	2	1	2	1	1	3	5	5	4	3	3	2	4	4	5	1	1	3	4	4	No	No	No	No	No	No	No	No	4	2	3	4	4	4	3
79	3	3	A	C	1	2	2	1	4	5	5	4	2	2	2	4	4	2	1	5	5	5	5	5	5	5	4	5	3	5	5	5	5	3	No	No	No	No	No	No	No	Yes	4	4	3	3	2	4	2
80	3	3	B	B	2	2	3	2	2	4	4	3	3	4	3	2	3	2	3	4	4	4	4	4	4	4	4	4	4	4	4	4	4	4	Yes	No	Yes	No	No	No	No	No	3	3	3	3	3	4	3
81	2	4	B	C	1	2	1	1	2	2	2	1	1	2	1	2	2	1	1	5	5	5	5	5	5	5	5	4	5	4	5	5	5	3	No	No	No	No	No	No	No	Yes	4	4	4	4	4	4	4
82	4	4	B	E	2	2	2	1	1	2	2	1	1	2	1	1	1	1	1	5	4	5	5	3	4	5	5	5	5	4	4	4	3	5	No	No	No	No	No	No	No	No	3	4	0	3	2	1	3
83	4	3	B	D	2	2	3	2	3	2	2	1	2	2	2	1	2	1	1	3	4	5	4	5	4	3	2	2	4	4	2	4	2	3	No	No	No	No	No	No	No	Yes	3	3	1	1	2	4	2
84	2	3	B	A	1	2	1	2	2	1	1	1	1	1	1	1	1	1	1	4	5	5	4	5	4	5	4	4	4	3	4	5	3	3	No	No	No	No	No	No	No	Yes	3	4	2	2	2	4	3
85	2	4	A	D	2	3	2	2	2	1	1	2	2	2	1	1	2	2	1	4	4	3	4	5	5	4	3	4	4	4	4	4	4	3	No	No	No	No	No	No	No	Yes	4	3	3	2	2	3	3
86	2	3	A	E	2	2	2	1	1	1	1	1	1	1	1	1	1	1	1	5	5	5	5	5	5	5	5	5	5	4	5	5	5	4	No	No	No	No	No	No	No	Yes	4	4	1	1	2	0	3
87	2	4	A	E	2	2	2	2	1	2	3	1	2	2	3	2	3	3	2	4	5	4	4	5	5	5	3	4	5	4	4	3	3	4	Yes	No	No	No	No	No	Yes	No	3	2	3	2	2	3	3
88	3	3	B	C	2	2	2	1	3	3	2	2	2	3	2	2	2	1	2	3	4	4	5	5	4	5	3	4	4	4	4	4	3	4	No	No	No	No	No	Yes	No	Yes	3	4	4	2	2	3	3
89	1	2	A	C	1	1	1	1	1	1	1	1	1	2	1	1	1	2	1	5	5	5	5	5	5	5	5	5	5	5	5	5	5	5	No	No	No	No	No	No	No	No	4	4	4	4	4	4	4
90	2	4	A	E	1	1	1	1	1	1	1	1	1	1	1	1	1	1	1	3	5	5	5	5	5	5	5	5	5	5	5	5	5	5	No	No	No	No	No	No	No	Yes	4	4	2	4	4	4	4
91	4	3	A	D	2	2	3	2	2	2	2	1	1	2	2	2	1	2	1	5	5	5	5	5	5	5	5	5	5	5	5	5	5	5	No	No	No	No	No	No	No	No	4	4	4	4	4	4	4
92	3	3	B	A	1	1	1	1	2	2	2	1	1	1	1	1	1	1	1	4	5	5	4	5	4	4	3	4	3	3	3	5	3	4	No	No	No	No	No	No	No	No	4	3	3	4	4	4	0
93	3	3	B	A	2	2	1	2	1	3	2	1	2	4	2	2	2	2	1	5	5	5	5	5	4	5	4	4	5	4	4	4	5	4	No	No	No	No	No	No	No	Yes	4	4	3	4	4	4	3
94	3	3	B	A	1	2	2	1	2	1	1	1	1	2	2	1	1	1	1	5	5	4	5	5	3	4	4	3	5	5	4	4	5	4	No	No	No	No	No	No	No	No	3	4	2	1	2	4	4
95	1	4	B	B	1	1	1	1	2	1	2	1	1	1	1	2	1	1	1	3	5	4	5	2	4	4	5	2	5	5	5	4	3	4	No	No	No	No	No	No	No	Yes	4	3	4	4	4	4	2
96	4	3	B	E	2	2	3	2	1	3	3	1	2	3	2	2	2	2	2	4	5	5	4	5	4	5	4	4	3	4	4	5	3	4	No	No	No	No	No	No	Yes	No	2	3	0	3	4	4	4
97	1	3	A	E	1	1	1	1	1	1	1	1	1	1	1	1	1	1	1	3	4	4	4	5	3	5	3	4	4	2	3	4	4	3	No	No	No	No	No	No	No	No	2	3	1	2	3	4	2
98	3	4	B	E	1	1	1	1	1	1	2	1	1	1	1	1	1	1	1	5	5	5	5	5	5	5	5	5	5	5	5	5	5	1	No	No	No	No	No	No	No	No	3	4	4	4	3	4	4
99	2	4	A	C	1	2	3	1	2	1	2	1	2	1	2	1	1	1	2	3	5	4	5	4	3	4	5	4	4	5	3	4	4	4	No	No	No	No	No	No	No	No	4	4	2	2	3	4	4
100	4	3	B	E	2	1	1	2	1	1	1	1	2	2	1	2	1	1	1	4	5	5	5	5	5	5	5	5	5	5	5	5	5	5	No	Yes	No	No	No	No	No	No	4	4	2	2	2	4	4
101	2	3	B	C	1	2	1	2	1	2	1	2	1	1	2	2	1	1	1	5	5	5	5	5	5	5	5	3	4	5	5	5	5	5	Yes	No	No	Yes	Yes	No	No	No	4	4	4	4	4	3	4
102	4	4	B	C	1	1	2	2	2	2	1	1	1	2	2	2	2	2	2	4	5	5	5	5	5	4	5	4	4	4	5	5	4	4	No	Yes	No	No	No	No	No	No	3	3	3	3	3	3	3
103	4	4	B	E	2	3	3	2	3	2	2	1	1	2	2	2	1	1	1	4	5	5	5	4	4	5	4	4	4	5	4	3	3	3	No	No	No	No	No	No	No	No	3	0	3	0	3	4	0
104	2	3	A	A	2	3	3	3	3	2	3	2	2	2	3	2	2	1	1	4	4	4	4	5	5	5	4	4	3	4	3	3	2	3	No	No	No	No	No	No	No	No	2	3	2	2	2	1	3
105	1	2	D	A	1	1	1	1	1	1	2	1	1	1	1	1	1	1	1	3	4	4	4	4	4	4	4	4	3	4	3	2	2	3	No	No	No	No	No	No	No	No	3	2	2	4	4	3	2
106	3	4	A	E	1	1	2	1	2	2	2	1	2	2	2	1	1	1	1	5	4	5	5	5	5	5	5	4	5	5	4	5	5	5	No	No	No	No	No	No	No	Yes	4	4	2	2	2	2	4
107	4	3	A	A	2	2	3	2	2	1	1	1	1	1	1	2	1	2	1	5	5	5	5	5	5	5	5	5	5	5	5	5	5	5	No	No	No	No	No	No	No	No	3	3	1	2	2	2	4
108	3	3	B	E	2	2	2	4	3	1	3	1	2	2	2	1	1	1	1	5	5	5	5	5	5	5	4	5	5	5	4	5	5	5	No	No	No	No	No	No	No	No	4	4	2	2	2	4	3
109	3	3	B	E	1	2	3	2	2	1	1	2	1	1	1	2	1	2	1	3	4	4	3	4	2	4	5	2	4	3	4	3	2	4	No	No		No	No	No	No	No	2	3	3	4	3	4	2
110	2	3	B	A	1	2	3	2	4	2	1	1	1	2	1	1	2	1	1	5	5	4	4	5	5	4	4	5	3	5	5	5	4	5	No	No	No	No	Yes	No		No	3	4	2	4	4	4	4
111	2	3	A	A	2	3	4	2	3	2	3	1	2	3	1	2	2	2	1	5	4	5	5	5	4	5	5	5	3	4	4	5	5	4	No	No	No	No	No	No	No	Yes	4	4	3	4	4	4	2
112	2	4	B	C	2	3	4	4	3	3	4	2	3	3	2	3	3	2	3	4	4	4	5	5	5	4	4	3	5	4	4	4	3	3	No	No	No	No	No	No	No	No	3	3	2	1	1	2	2
113	2	3	A	A	2	2	3	2	2	3	2	1	2	2	2	1	1	2	1	4	4	5	5	5	5	5	5	5	5	4	5	5	5	5	No	No	No	No	No	No	No	No	4	4	3	3	2	4	4
114	2	3	B	E	2	2	3	3	3	2	1	1	1	2	2	1	2	2	1	3	5	5	4	5	3	3	1	2	2	4	3	5	3	5	No	No	No	No	No	No	No	No	3	2	3	4	4	4	2
115	3	4	B	A	1	2	1	2	1	2	3	1	1	3	1	2	1	1	1	4	5	5	5	5	5	5	4	4	5	5	4	5	4	5	No	No	No	No	No	Yes	No	No	3	4	2	2	2	4	3
116	1	3	B	A	1	1	1	1	1	1	1	1	1	1	1	1	1	1	1	5	5	5	5	5	5	5	5	4	5	5	5	5	5	5	No	No	No	No	Yes	Yes	No	Yes	4	4	0	4	4	4	4
117	2	4	B	A	2	2	2	2	2	2	2	1	1	1	2	2	2	1	1	4	4	4	5	4	4	3	4	3	3	4	5	4	3	3	No	No	No	No	No	No	No	No	3	3	2	3	3	4	3
118	1	2	B	C	2	2	1	2	2	1	1	1	2	2	2	1	1	2	2	3	4	3	4	3	4	2	2	3	4	4	3	3	3	3	No	No	No	No	No	No	No	No	3	2	4	2	2	3	3
119	1	4	B	C	1	2	2	2	1	2	3	2	2	2	1	3	3	2	2	3	4	4	3	5	4	5	4	4	5	5	4	5	4	5	No	No	No	No	Yes	Yes	No	Yes	4	4	3	3	3	3	4
120	1	4	A	C	1	1	3	1	3	2	1	1	3	1	2	2	3	1	1	5	5	5	5	5	5	5	5	5	5	5	5	5	5	5	No	No	No	No	No	No	No	No	4	4	4	4	4	4	2
121	1	3	D	D	2	2	2	3	2	2	2	2	2	2	2	2	2	2	2	3	4	3	4	4	3	3	3	3	3	3	3	3	3	3	No	No	No	No	No	No	No	No	2	3	2	3	3	3	2
122	2	3	B	B	3	2	3	2	3	3	1	3	2	3	2	4	3	3	2	3	3	2	3	2	3	2	2	3	3	2	3	3	3	3	Yes	No	No	No	No	No	No	No	2	3	3	4	3	4	3
123	2	3	B	E	2	2	2	1	1	1	1	1	1	1	1	1	2	1	1	3	4	4	3	5	5	5	4	3	4	3	4	4	4	4	No	No	No	No	No	No	No	No	3	3	2	2	3	3	2
124	1	4	B	A	1	2	2	2	3	2	2	2	1	1	2	1	1	1	1	3	5	4	5	5	4	5	4	4	4	5	4	4	4	5	No	No	No	No	No	Yes	No	Yes	3	4	4	4	2	3	3
125	2	2	B	E	1	1	2	1	1	1	1	1	1	1	1	1	1	1	1	4	5	4	5	5	4	3	3	4	4	4	4	5	5	4	No	No	No	No	No	No	No	No	4	4	2	3	3	4	3
126	2	3	B	E	1	3	3	1	2	1	1	1	1	2	2	1	1	1	1	5	5	5	5	5	5	5	5	4	5	4	5	5	5	4	No	No	No	No	No	No	No	Yes	4	4	3	2	2	4	2
127	2	2	B	C	1	2	2	2	3	2	2	1	2	3	4	2	2	2	2	5	5	5	5	5	4	5	5	5	4	5	5	4	4	4	Yes	No	No	No	No	No	No	No	4	3	3	3	3	4	3
128	2	4	B	E	1	2	2	1	1	2	2	1	2	2	1	1	1	1	1	5	5	5	5	4	5	4	5	4	4	5	5	4	4	5	No	No	Yes	No	No	No	No	No	4	3	3	4	4	4	3
129	3	3	B	A	1	1	3	1	2	2	2	2	3	2	2	2	1	1	1	4	5	4	5	4	5	5	5	3	5	4	5	4	5	5	No	No	No	No	No	Yes	No	No	3	4	2	2	2	2	4
130	4	4	B	B	1	2	2	2	2	2	1	2	2	2	2	2	2	2	2	4	4	5	5	4	4	5	4	4	4	4	4	5	5	5	No	No	No	No	No	No	No	No	3	4	2	2	2	2	3
131	1	3	B	D	2	1	2	2	2	2	2	2	1	2	2	1	1	2	1	4	5	5	5	5	5	4	4	5	5	5	5	5	5	4	No	No	No	No	No	No	No	No	3	4	3	4	4	4	4
132	2	4	B	A	1	2	2	2	2	2	1	2	1	2	2	2	1	1	1	5	5	5	5	5	5	5	5	4	4	5	4	5	4	5	No	No	No	No	No	Yes	No	Yes	4	4	3	2	1	4	4
133	2	3	B	A	2	2	2	2	1	2	1	1	1	1	1	1	1	1	1	4	5	4	5	5	5	5	5	5	4	5	5	5	5	4	No	No	No	No	No	No	No	No	4	3	2	2	2	4	2
134	4	4	B	A	2	2	1	2	3	2	3	1	1	3	2	2	2	2	2	4	5	4	4	4	4	5	4	5	5	4	4	4	3	3	No	No	No	No	No	No	No	No	3	3	3	3	3	4	2
135	1	3	A	E	1	1	2	2	1	1	1	1	1	2	1	2	1	1	1	5	3	4	5	5	4	5	4	4	5	3	5	4	4	4	No	No	No	No	No	Yes	No	No	4	4	3	3	4	4	3
136	3	2	A	A	2	2	1	2	1	1	1	1	1	1	1	1	1	1	1	5	5	5	5	5	4	4	5	5	5	5	5	4	5	5	No	No	No	No	No	No	No	No	4	4	4	4	4	4	4
137	3	2	B	D	2	2	4	2	2	4	1	1	1	2	2	1	2	2	1	3	5	5	4	5	4	4	4	3	5	4	2	5	1	4	No	No	No	No	No	No	No	Yes	3	2	2	2	2	2	3
138	4	2	B	C	2	2	4	2	4	2	2	1	2	4	2	2	4	2	1	5	5	5	5	5	5	5	5	5	5	5	5	5	5	5	No	No	No	No	No	No	Yes	Yes	4	4	2	2	2	3	0
139	3	2	B	D	2	1	5	2	5	1	1	1	1	1	5	2	1	2	2	4	5	5	4	4	4	4	3	3	4	4	2	2	3	5	No	No	No	No	No	No	No	Yes	4	3	3	4	4	4	2
140	3	4	B	C	1	4	2	1	2	1	1	1	1	1	2	1	1	2	2	5	5	4	5	5	4	5	5	3	4	4	5	4	5	5	No	No	No	No	No	Yes	Yes	No	4	4	4	4	4	4	4
141	4	4	A	C	2	2	2	2	1	1	2	1	1	4	2	1	2	2	2	5	5	5	5	5	5	5	4	4	5	5	4	5	4	5	No	Yes	No	No	No	No	Yes	No	4	4	4	4	4	4	4
142	4	3	B	A	2	4	2	2	4	2	2	1	1	2	2	2	2	1	2	4	5	5	5	5	4	5	4	4	4	5	4	5	4	4	No	No	No	No	No	No	No	No	3	3	4	4	4	4	3
143	4	4	B	C	1	2	2	2	4	2	2	1	1	2	1	2	2	2	2	5	5	5	5	5	5	5	5	5	4	5	5	5	5	5	Yes	No	Yes	No	No	No	No	No	4	4	4	4	4	4	3
144	4	3	B	A	2	2	2	2	2	1	2	1	1	2	2	2	2	2	1	4	4	5	4	5	5	5	4	5	5	4	5	4	4	5	No	No	No	No	No	No	No	No	4	4	4	4	4	4	3
145	3	2	B	C	2	2	2	2	4	2	1	2	1	1	2	2	2	2	1	5	5	5	5	5	4	4	5	4	4	5	4	5	5	5	Yes	No	No	No	Yes	No	No	Yes	4	4	2	2	2	4	3
		2:EE
		3:IEAE
		4:ME
		In red: outliers
